# Supplementary material for: β-Secretase-1: In Silico Drug Reposition for Alzheimer’s Disease
Source: MDPI journal article supplement (doi:10.3390/ijms24098164), 2023-05-03
Supplement: s1 [file s1]

## Supplementary Material

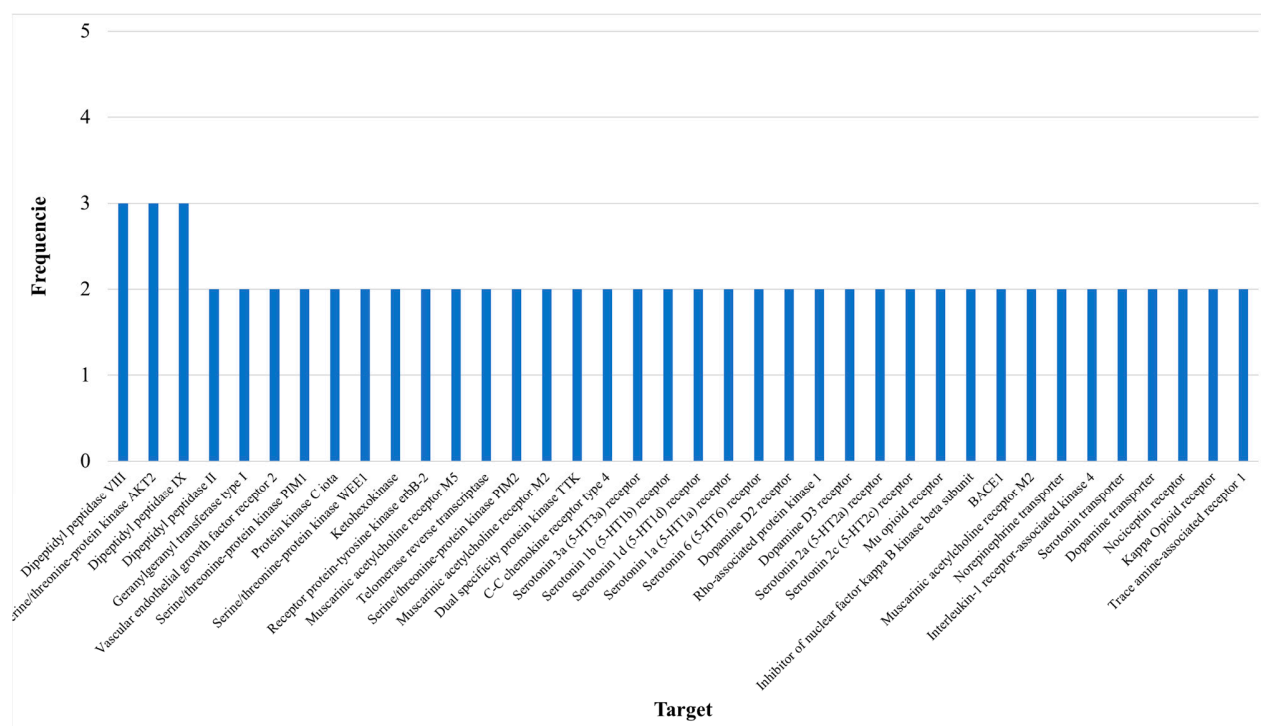

**Figure S1.** Frequency diagram by Swiss Target Prediction.

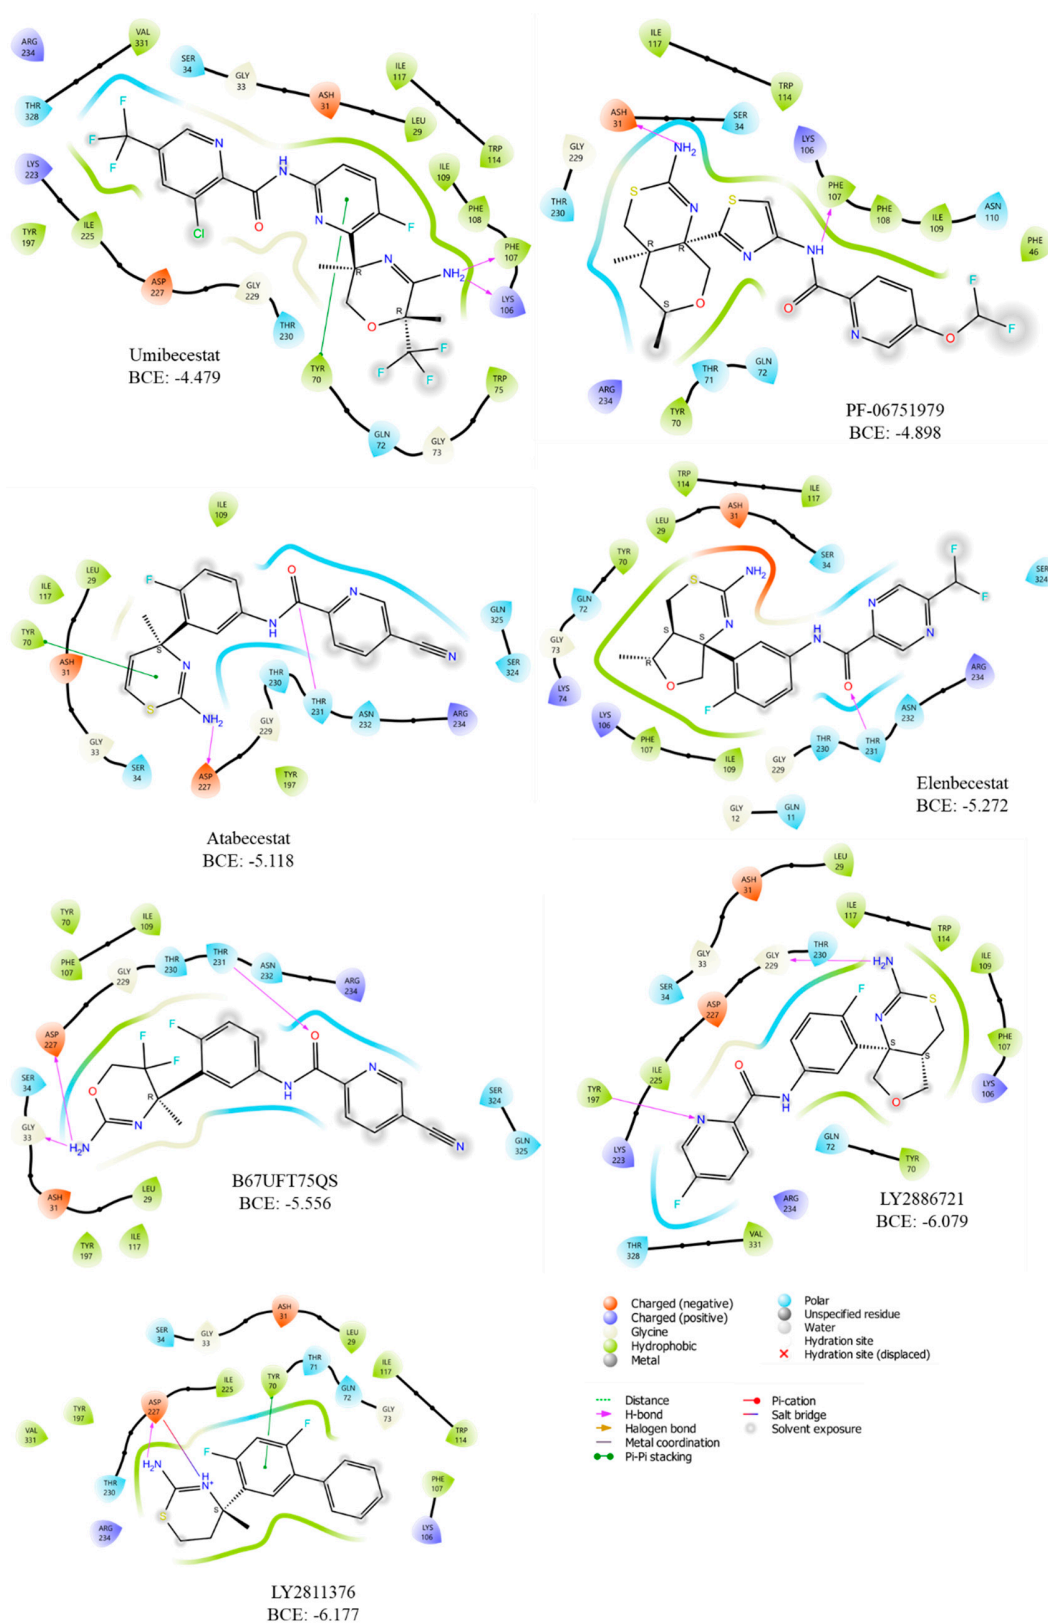

**Figure S2.** 2D interaction and Binding coupling energy of reference inhibitors in BACE-1.
